# Supplementary material
Source: HighWire-hosted journal article supplement (https://bmjopenquality.bmj.com/highwire/filestream/135908/field_highwire_adjunct_files/2/ds3729.pdf)
Supplement: ds3729.pdf [file ds3729.pdf]

# Non-Invasive Ventilation (NIV) Prescription Chart

**Patient details:**  
 Forename:.....  
 Surname: .....  
 Hospital No: .....  
 DOB: .....  
 (or affix sticker)

**(1) Complete NIV Prescription Checklist:**

|                                                                                                              |     |    |
|--------------------------------------------------------------------------------------------------------------|-----|----|
| Is there a respiratory acidosis (pH <7.35, PaCO <sub>2</sub> >6) despite best medical therapy?               | Yes | No |
| Has the patient been discussed with the on-call respiratory SpR/consultant?                                  | Yes | No |
| Has a decision been made regarding escalation of treatment if NIV fails?                                     | Yes | No |
| If the patient is a candidate for intubation, have they been discussed with the on-call ICU SpR /consultant? | Yes | No |

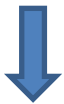

**(2) Record initial ABG:**

|                               |  |
|-------------------------------|--|
| Date                          |  |
| Time                          |  |
| FiO <sub>2</sub>              |  |
| pH                            |  |
| PaCO <sub>2</sub>             |  |
| PaO <sub>2</sub>              |  |
| HCO <sub>3</sub> <sup>-</sup> |  |
| BE                            |  |
| SO <sub>2</sub>               |  |

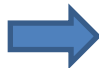

**(3) Prescribe initial NIV settings:**

|                                             |  |
|---------------------------------------------|--|
| IPAP                                        |  |
| EPAP                                        |  |
| FiO <sub>2</sub> on NIV                     |  |
| Recommended use<br>e.g. Breaks, time on/off |  |
| Doctor's name                               |  |
| Bleep                                       |  |
| Signature                                   |  |

**(4) Record all ABG measurements, including IPAP/EPAP settings:**

|                               | 1 | 2 | 3 | 4 | 5 |
|-------------------------------|---|---|---|---|---|
| Date                          |   |   |   |   |   |
| Time                          |   |   |   |   |   |
| pH                            |   |   |   |   |   |
| PaCO <sub>2</sub>             |   |   |   |   |   |
| PaO <sub>2</sub>              |   |   |   |   |   |
| HCO <sub>3</sub> <sup>-</sup> |   |   |   |   |   |
| BE                            |   |   |   |   |   |
| SpO <sub>2</sub>              |   |   |   |   |   |
| FiO <sub>2</sub>              |   |   |   |   |   |
| IPAP                          |   |   |   |   |   |
| EPAP                          |   |   |   |   |   |

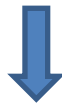

**(5) Prescribe changes to NIV settings according to ABG results:**

|                            | 1 | 2 | 3 | 4 | 5 |
|----------------------------|---|---|---|---|---|
| FiO <sub>2</sub> on NIV    |   |   |   |   |   |
| IPAP                       |   |   |   |   |   |
| EPAP                       |   |   |   |   |   |
| Recommended usage          |   |   |   |   |   |
| Reason for change          |   |   |   |   |   |
| Record if no change to NIV |   |   |   |   |   |
| Signature                  |   |   |   |   |   |
| Print Name                 |   |   |   |   |   |
| Date                       |   |   |   |   |   |
| Time                       |   |   |   |   |   |

**(6) Document most up to date plan for NIV use. E.g. Intended length of use/ weaning strategy.**

| Date        | Plan: |
|-------------|-------|
|             |       |
| Review Date |       |
|             |       |

| Date        | Plan: |
|-------------|-------|
|             |       |
| Review Date |       |
|             |       |

| Date        | Plan: |
|-------------|-------|
|             |       |
| Review Date |       |
|             |       |

| Date        | Plan: |
|-------------|-------|
|             |       |
| Review Date |       |
|             |       |

| Date        | Plan: |
|-------------|-------|
|             |       |
| Review Date |       |
|             |       |

| Date        | Plan: |
|-------------|-------|
|             |       |
| Review Date |       |
|             |       |
